# Supplementary material for: Investigation of the post-annealing electromagnetic response of Cu–Co oxide coatings via optical measurement and computational modelling
Source: Royal Society of Chemistry journal article supplement (doi:10.1039/c6ra25626k), 2017-01-01
Supplement: c6ra25626k1.pdf [file c6ra25626k1.pdf]

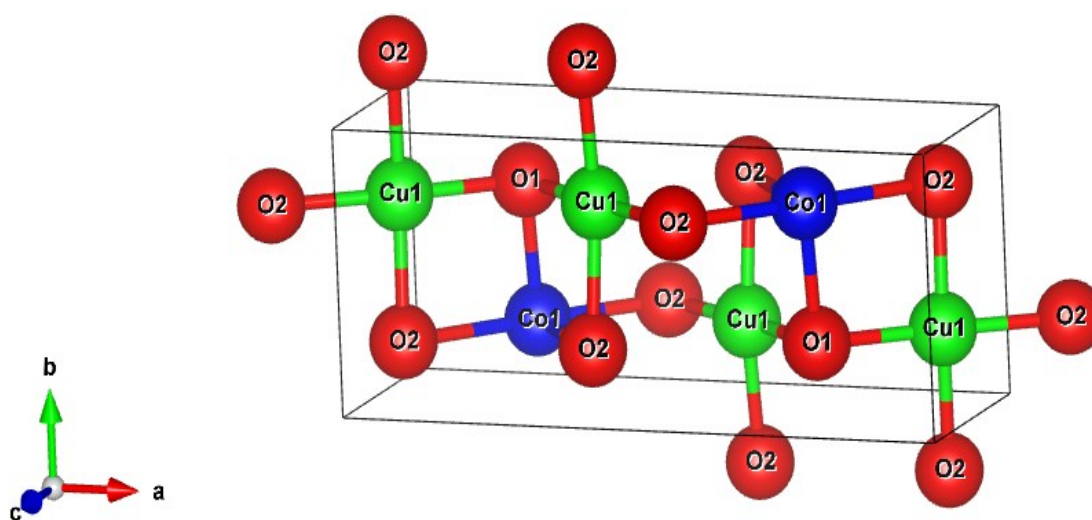

S1. Conventional unit cell of CuCo-oxide ( $\text{CoCu}_2\text{O}_3$ ) structure.

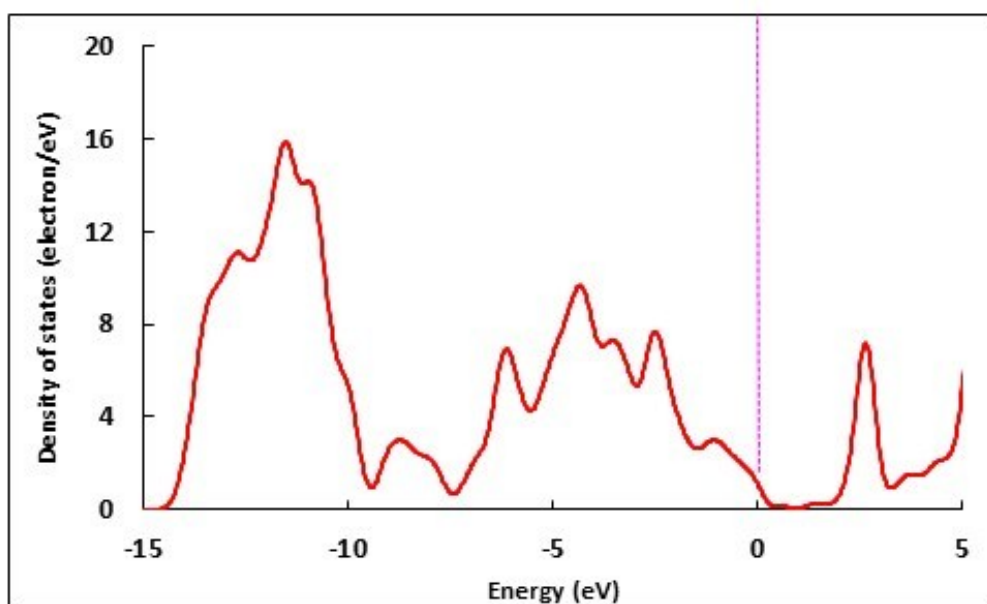

S2. Total density of states of CuCo-oxide ( $\text{CoCu}_2\text{O}_3$ ) clusters.

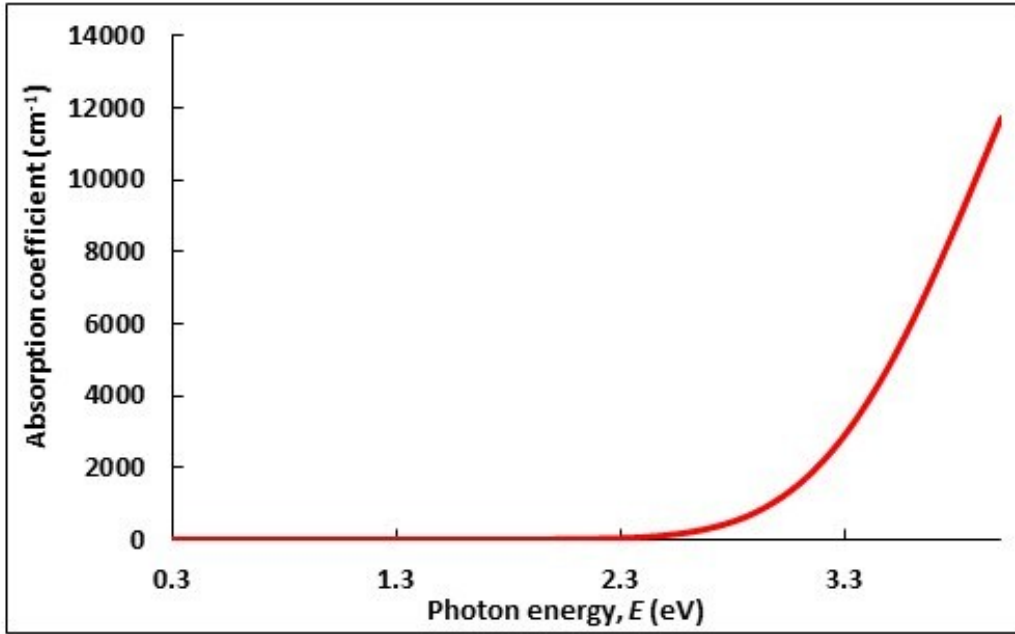

S3. Theoretical absorption spectrum of CoCu<sub>2</sub>O<sub>3</sub> clusters

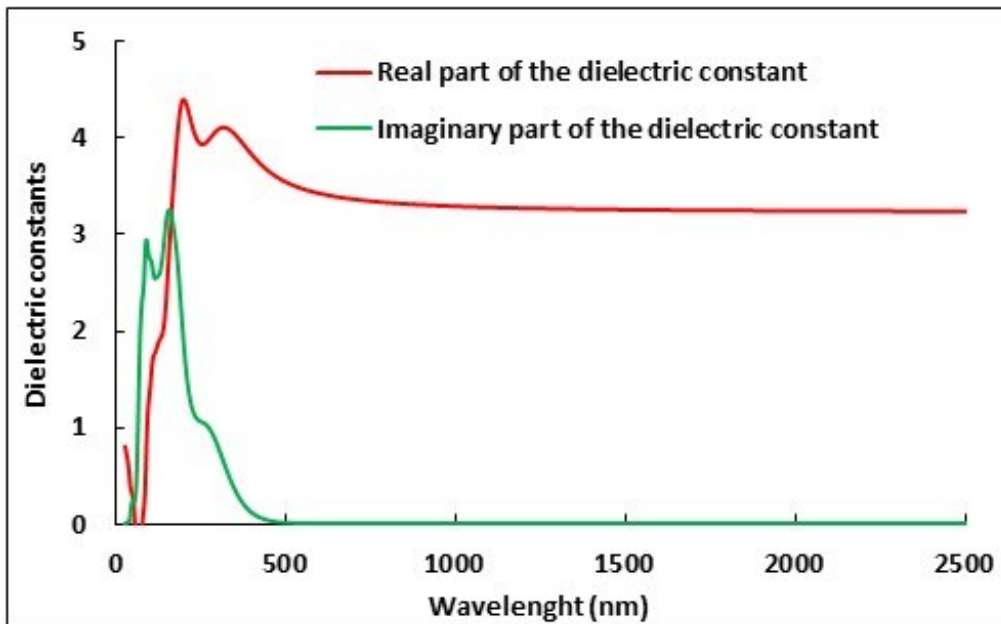

S4. Real and imaginary parts of dielectric constants of CoCu<sub>2</sub>O<sub>3</sub> clusters.

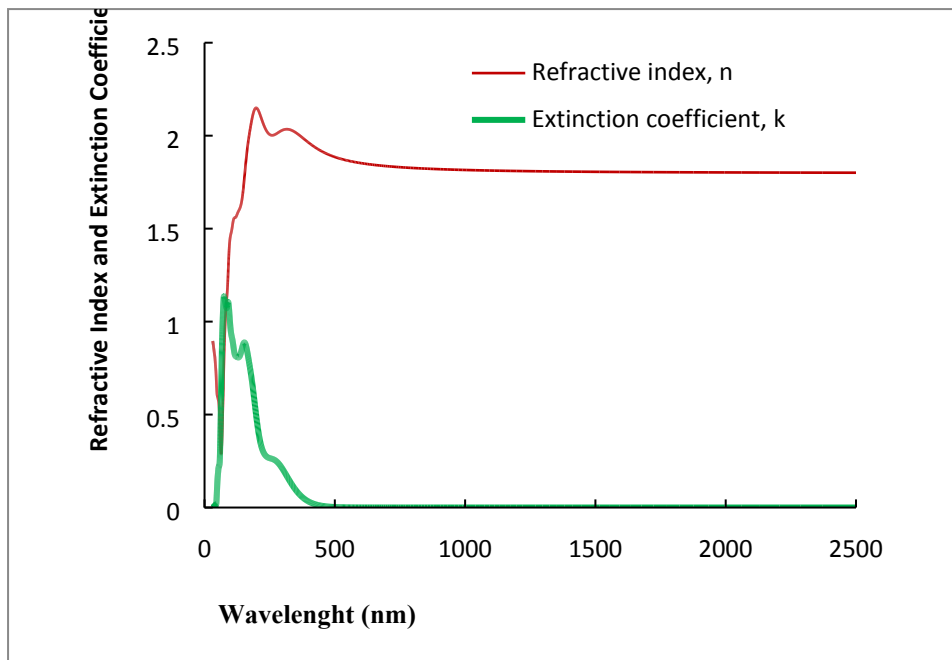

S5. Refractive index ( $n$ ) and extinction coefficient ( $k$ ) spectra of CuCo-oxide coatings.
